# Supplementary material for: Microtribological properties of a spin-coated thin film of 1-butyl-3-(propyltrimethoxysilane)imidazolium bis(mandelato)borate ionic liquid
Source: Royal Society of Chemistry journal article supplement (doi:10.1039/c6ra16497h), 2016-01-01
Supplement: c6ra16497h1.pdf [file c6ra16497h1.pdf]

## Supporting Information

# Microtribological Properties of Spin-Coated Thin Film of 1-Butyl-3-(propyltrimethoxysilane)imidazolium Bis(mandelato)borate Ionic Liquid

Paramjeet S. Bakshi,<sup>†</sup> Rashi Gusain<sup>†</sup> and Om P. Khatri\*

*Chemical Science Division, CSIR-Indian Institute of Petroleum, Dehradun – 248005, India*

\*Email: [opkhatri@iip.res.in](mailto:opkhatri@iip.res.in)

<sup>†</sup> These authors contributed equally to this work

PM IL 1R(00251)/CDCl3  
16.12.15

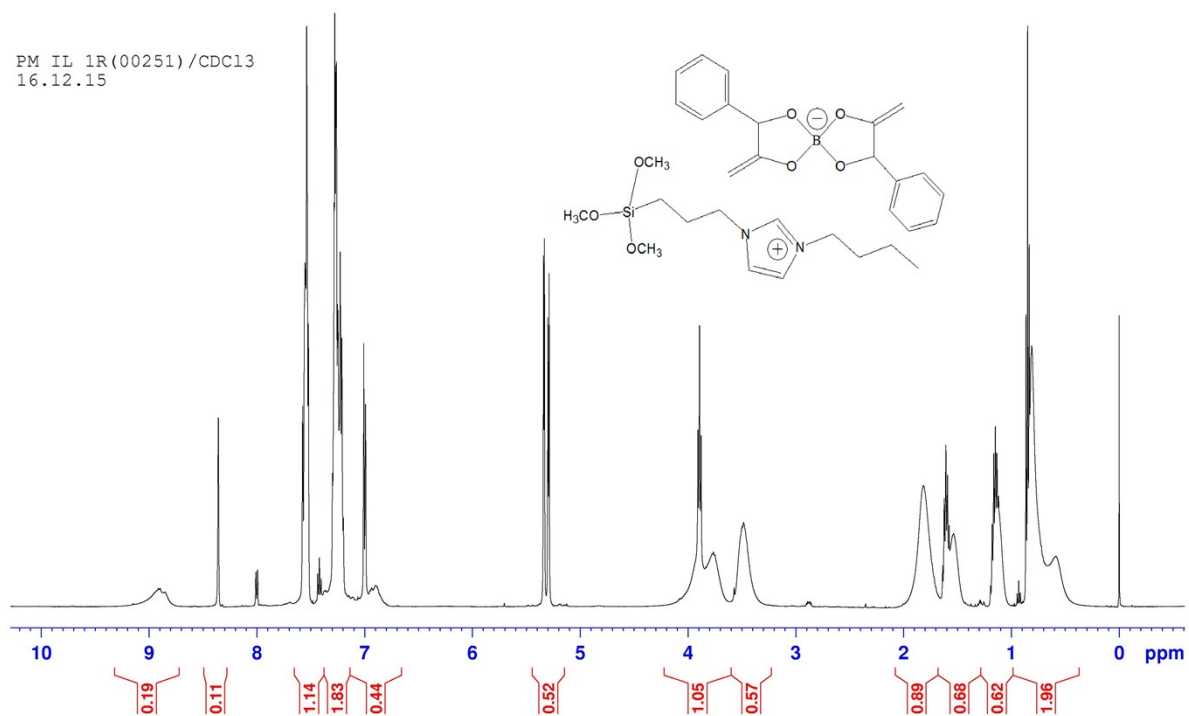

**Figure S1:** <sup>1</sup>H NMR spectrum of 1-butyl-3-(propyltrimethoxysilane)imidazolium bis(mandelato)borate (BPTmSiIm-BMdB) ionic liquid

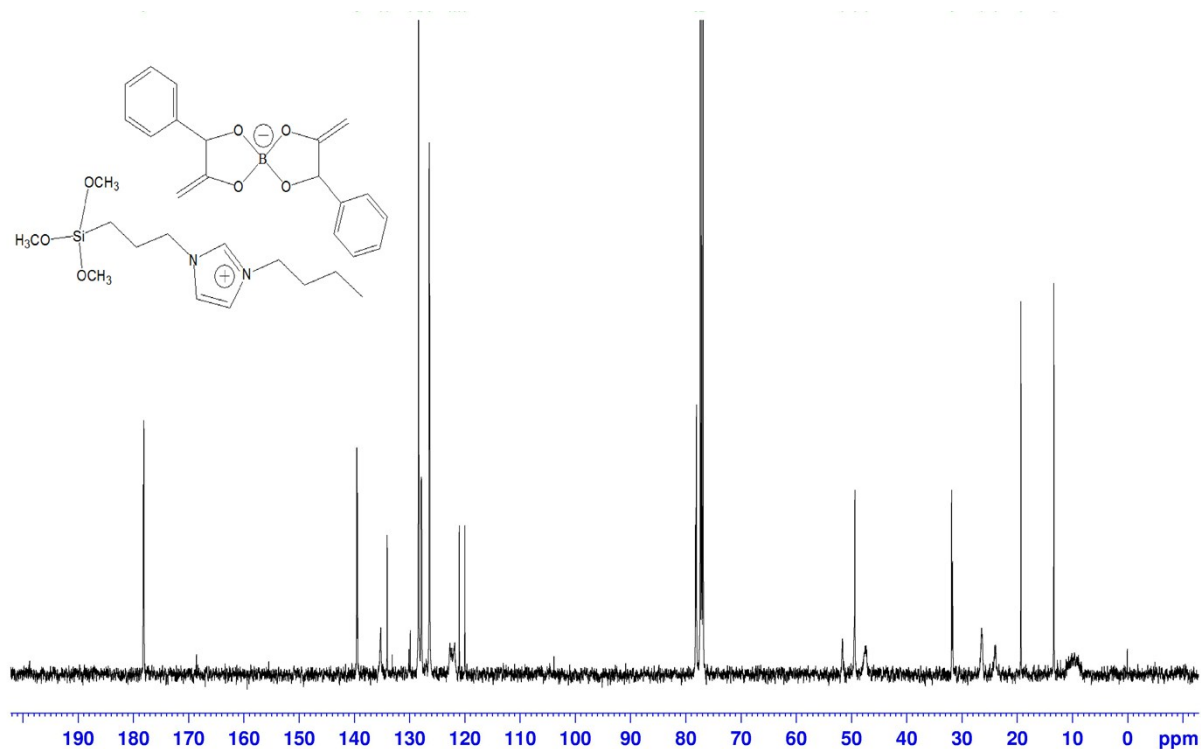

**Figure S2:**  $^{13}\text{C}$  NMR spectrum of 1-butyl-3-(propyltrimethoxysilane)imidazolium bis(mandelato)borate (BPtmSiIm-BMdB) ionic liquid

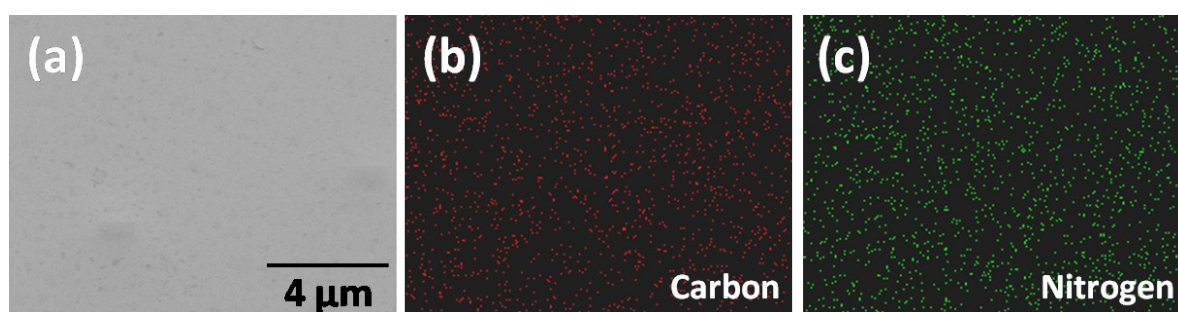

**Figure S3:** (a) FESEM image of a thin film of BPtmSiIm-BMdB ionic liquid deposited on a silicon substrate. (b and c) Corresponding Carbon and Nitrogen mapping based on EDX measurement of BSiPIm-BMdB thin film.

**Table S1:** Infrared modes of BPtmSiIm-BMdB ionic liquid along with their vibrational assignment

| <b>Peak position, cm<sup>-1</sup></b> | <b>Vibrational assignment</b>                       |
|---------------------------------------|-----------------------------------------------------|
| 3145, 3088, 3063, 3029                | $\nu(\text{C-H})$ , aromatic ring                   |
| 3000-2800                             | $\nu_a$ & $\nu_s$ $\text{CH}_2 / \text{CH}_3$ group |
| 1732                                  | $\nu(\text{C=O})$                                   |
| 1606                                  | $\nu_a(\text{COO})$                                 |
| 1538                                  | $\nu(\text{C=C})$ , aromatic                        |
| 1495, 1453                            | $\delta\text{CH}_2 / \text{CH}_3$ group             |
| 1270, 1257                            | $\nu_s(\text{COO})$                                 |
| 1099                                  | $\nu(\text{Si-O-Si})$                               |
| 929                                   | $\nu(\text{Si-O-C})$                                |
| 1029, 1003, 975                       | $\nu_a(\text{B-O})/\nu(\text{C-O})$                 |
| 769, 737, 694                         | $\nu_s(\text{B-O})$                                 |
